# Supplementary material
Source: PubMed Central journal article supplement (PMC4330590)
Supplement: supp_tpc.114.135194_tpc135194_SupplementalData.pdf [file supp_tpc.114.135194_tpc135194_SupplementalData.pdf]

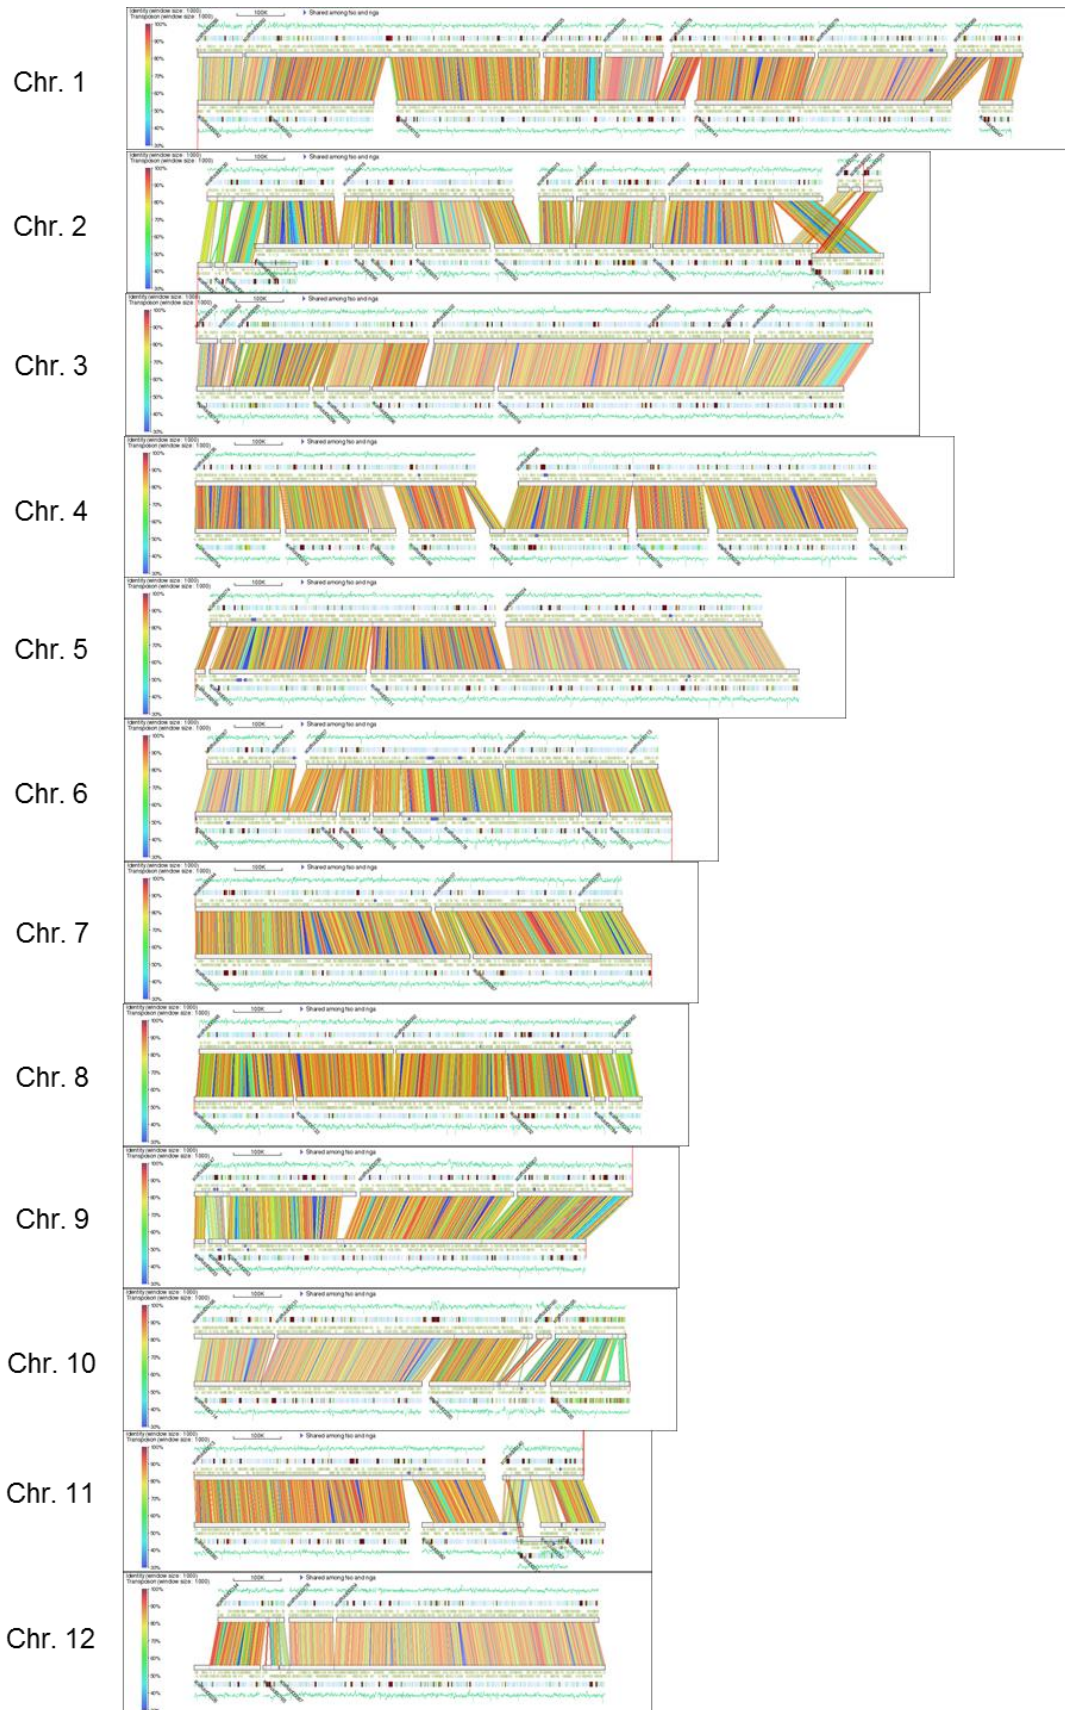

(continued)

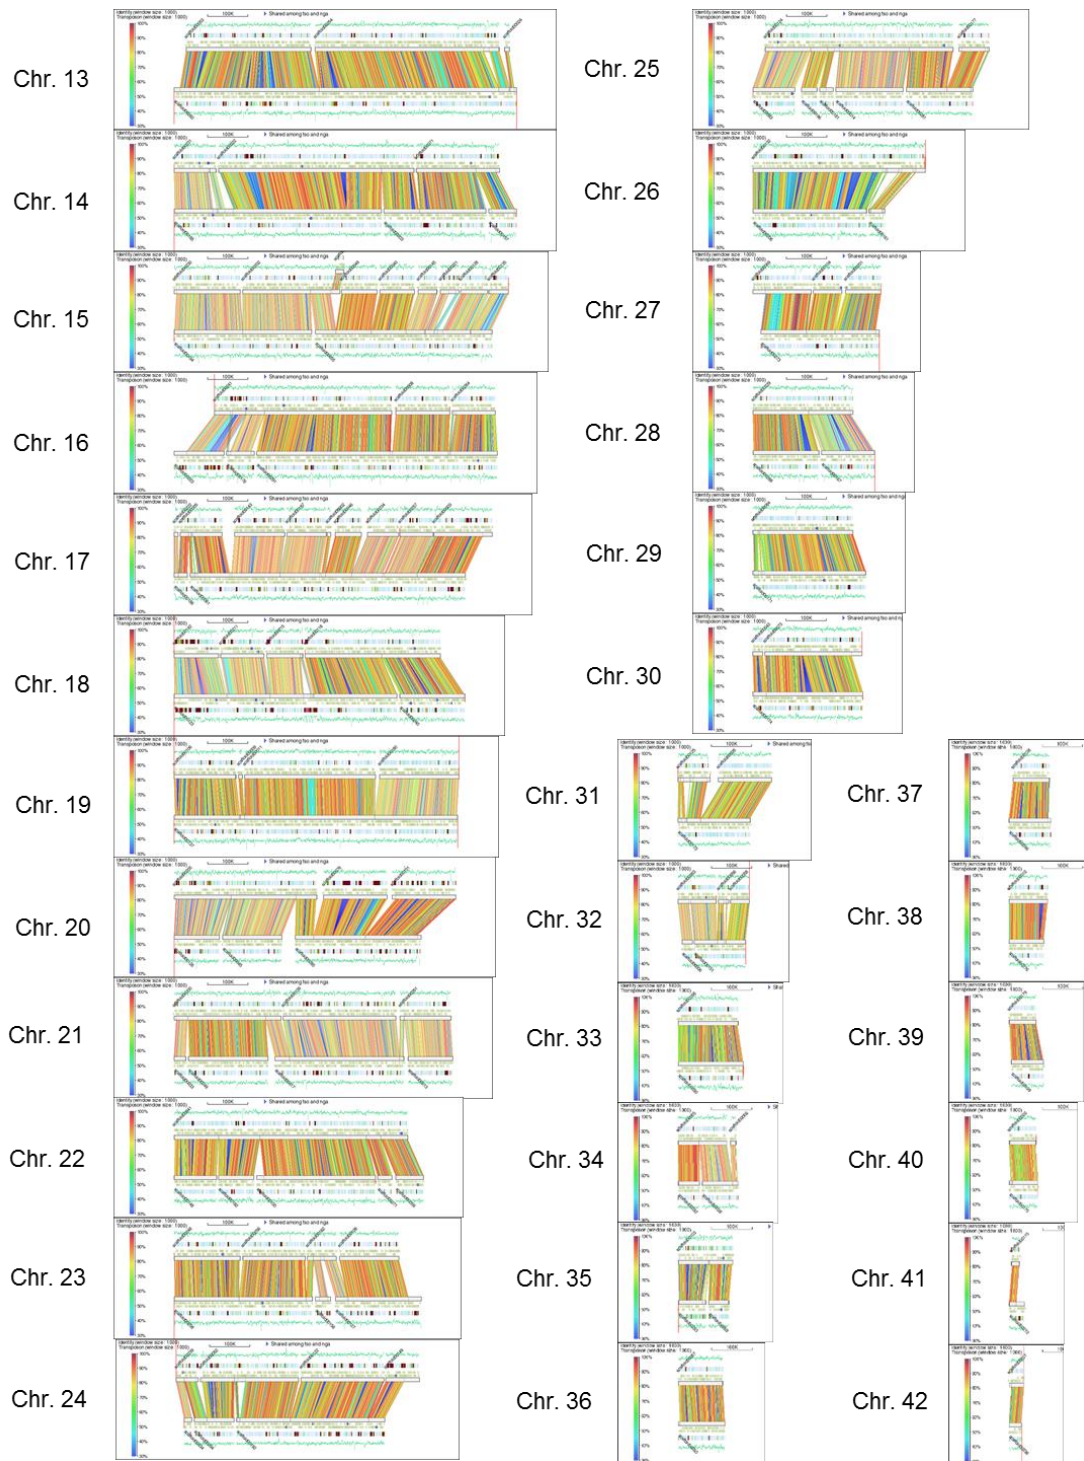

Supplemental Figure 1. Schematic representation of 84 chromosomes in *F. solaris* JPC DA0580. Chromosome pairs showing high synteny are adjacently aligned. Coloured lines connecting the chromosome pairs depict nucleotide sequence similarity in every thousand bases. Gene distribution, transposable elements, and GC contents are expressed in the innermost, second, and outer columns adjacent to the chromosomes. Genes belonging to the families which are shared with oleaginous microalga *N. gaditana* are shown in purple.

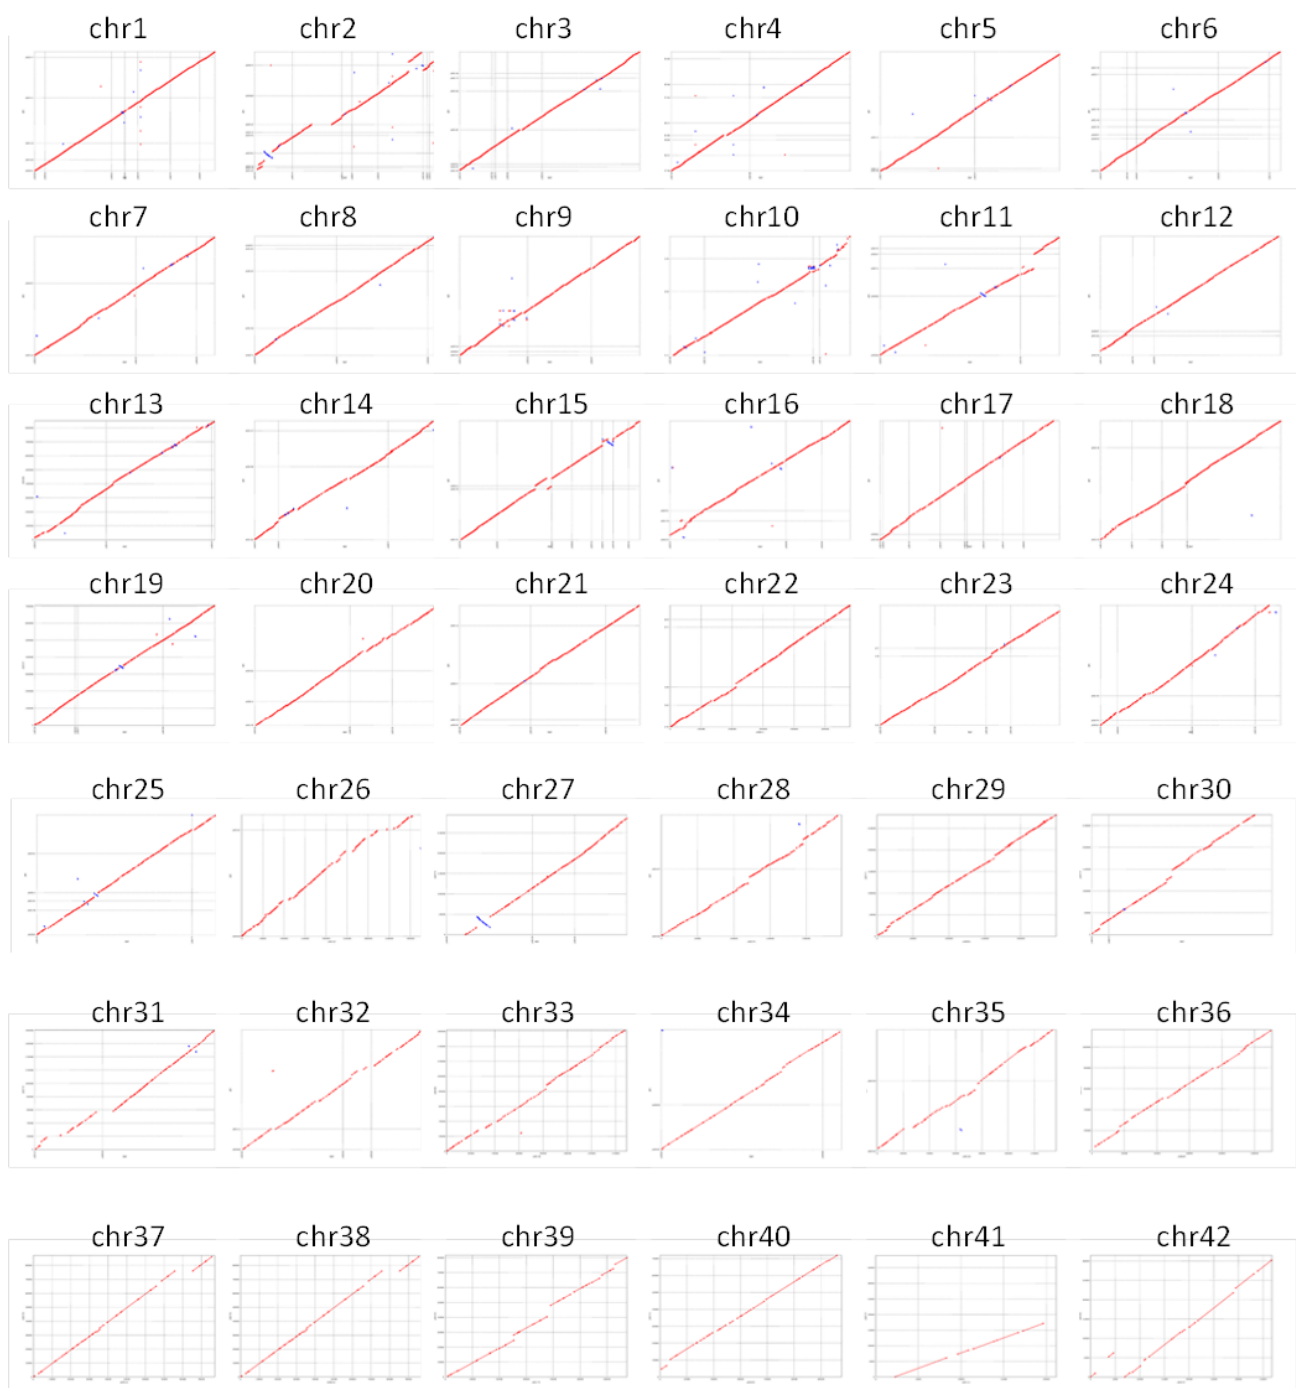

Supplemental Figure 2. Conservation of synteny between homeologous chromosome pairs in *F. solaris* JPCC DA0580



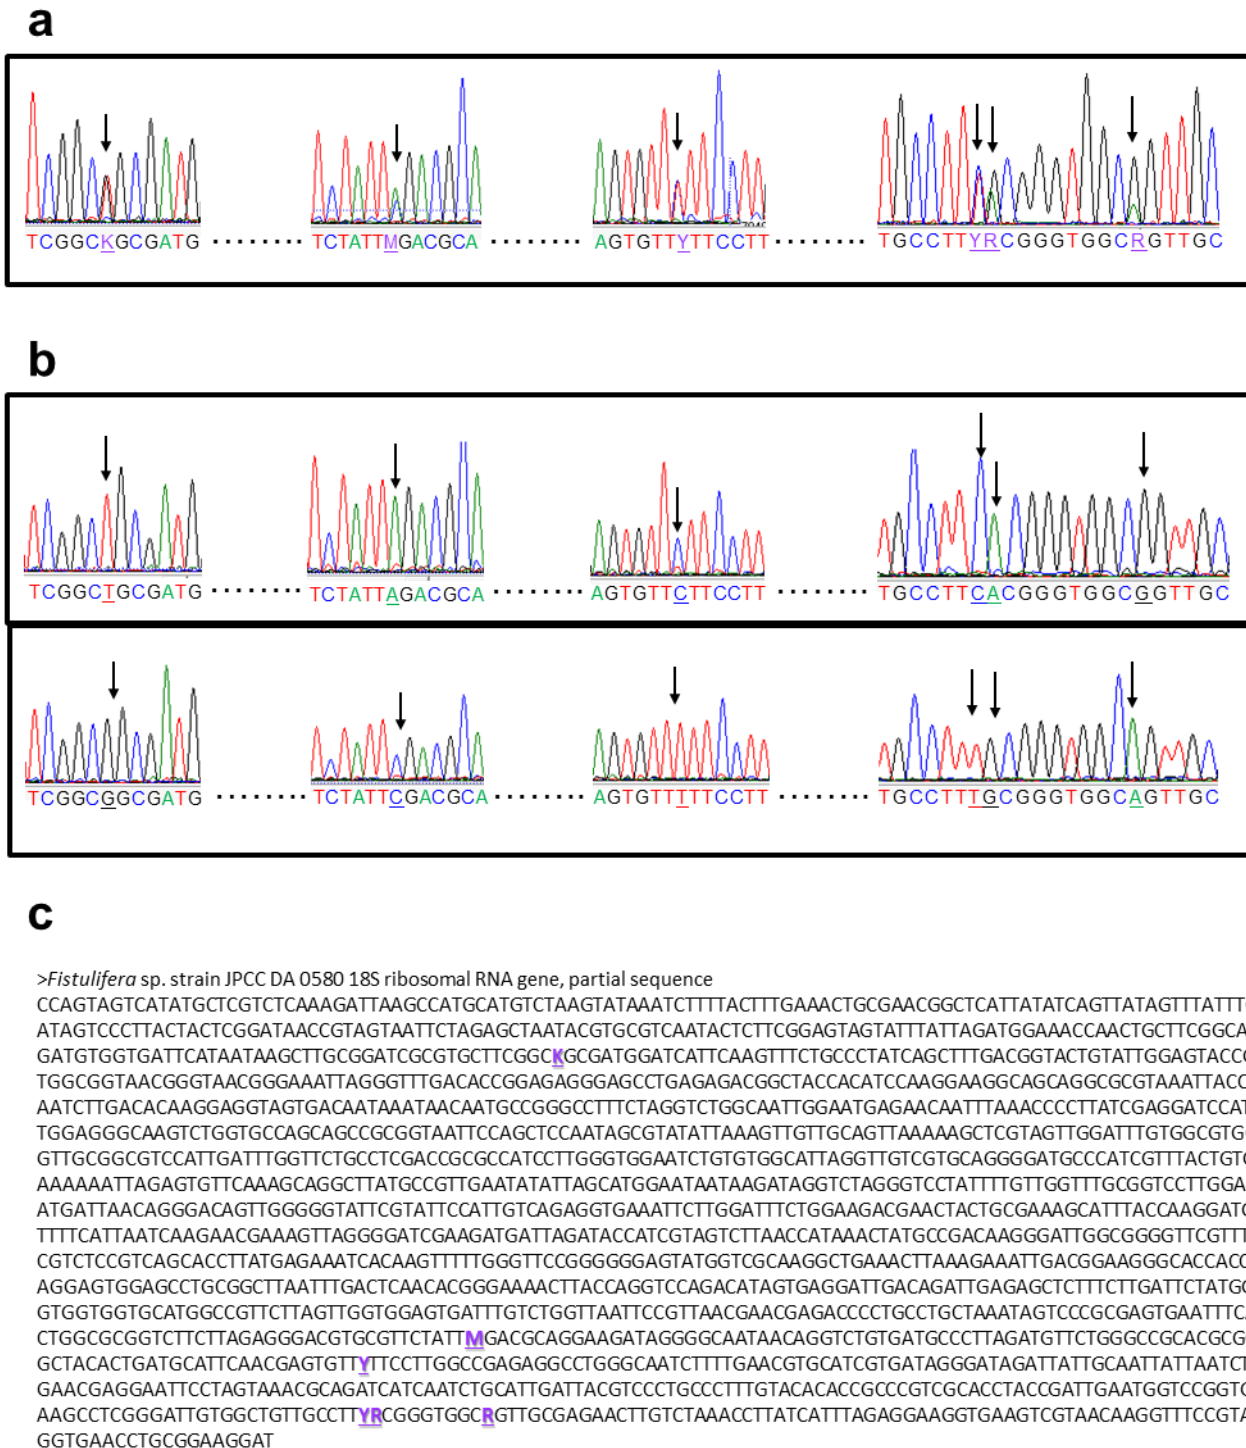

Supplemental Figure 3. The multiple 18S rDNA sequences in the genome of *F. solaris* JPCC DA0580. Sequencing data of the 18S rDNA PCR product (a) showed polymorphisms at six sites; after cloning, pure sequences for each type of rDNA were obtained (b). Polymorphic sites (purple characters) are shown in (c). K represents T or G, M represents A or C, Y represents C or T, R represents G or A.

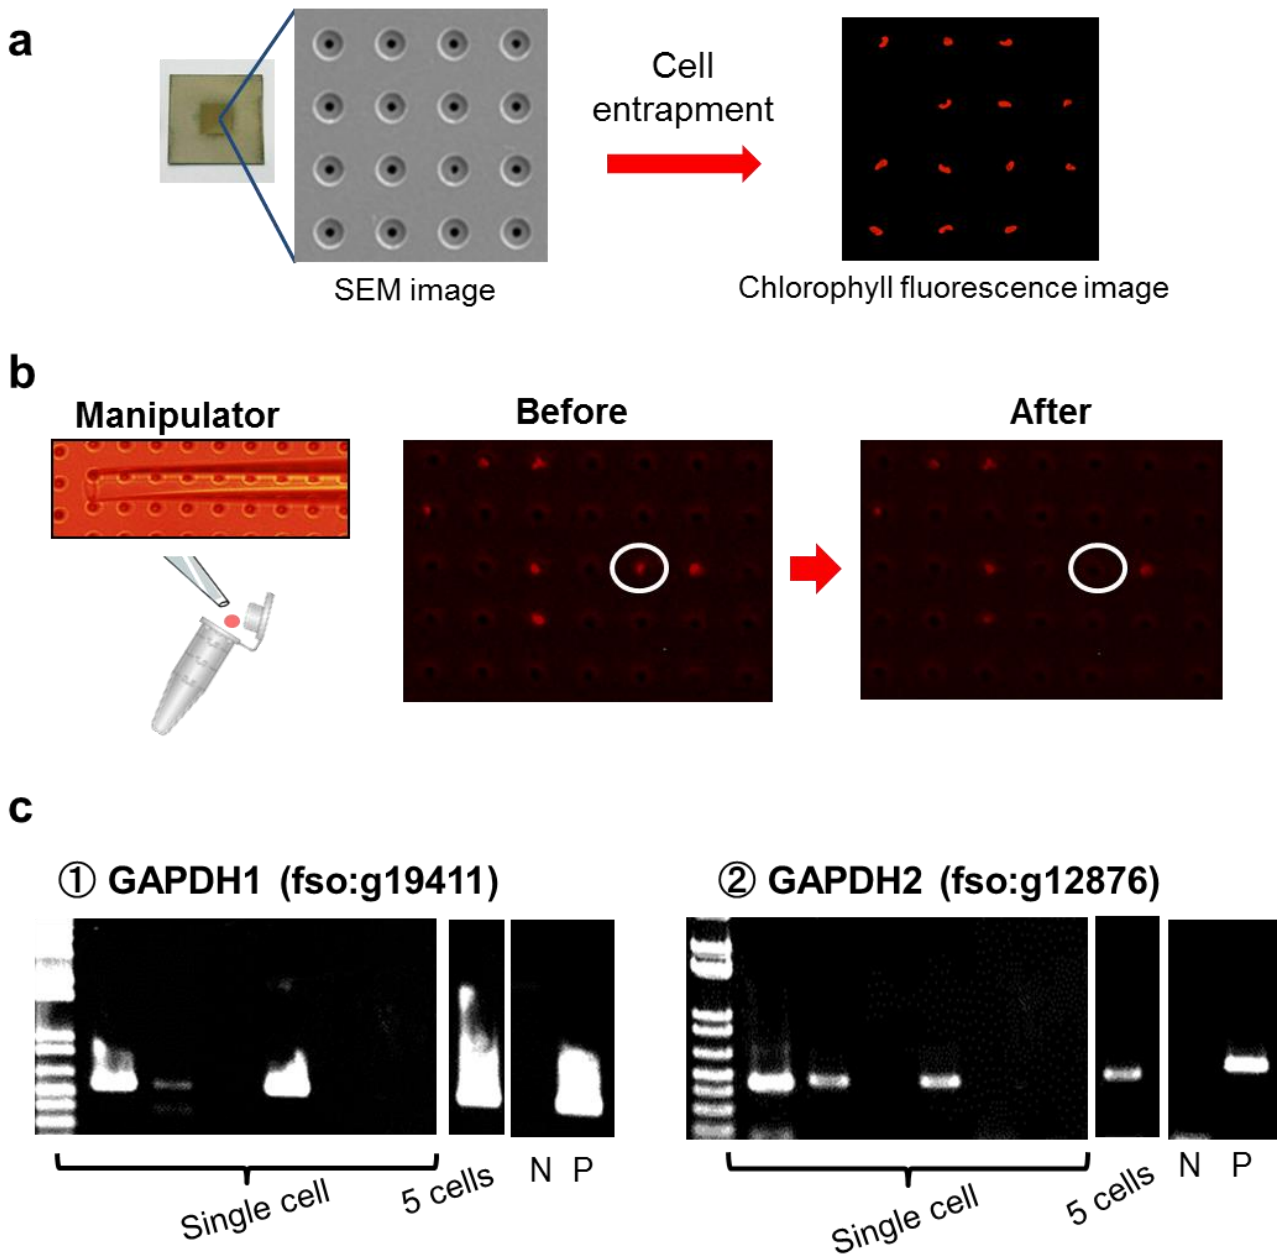

Supplemental Figure 4. Single-cell RT-PCR. (a) Microcavity array for entrapment and alignment of single cells; (b) Recovery of a single diatom from the microcavity array with a micromanipulator; (c) Single-cell RT-PCR of a putative homeologous GAPDH gene pair (fso:g19411 and fso:g12876). P: Positive control, N: Negative control

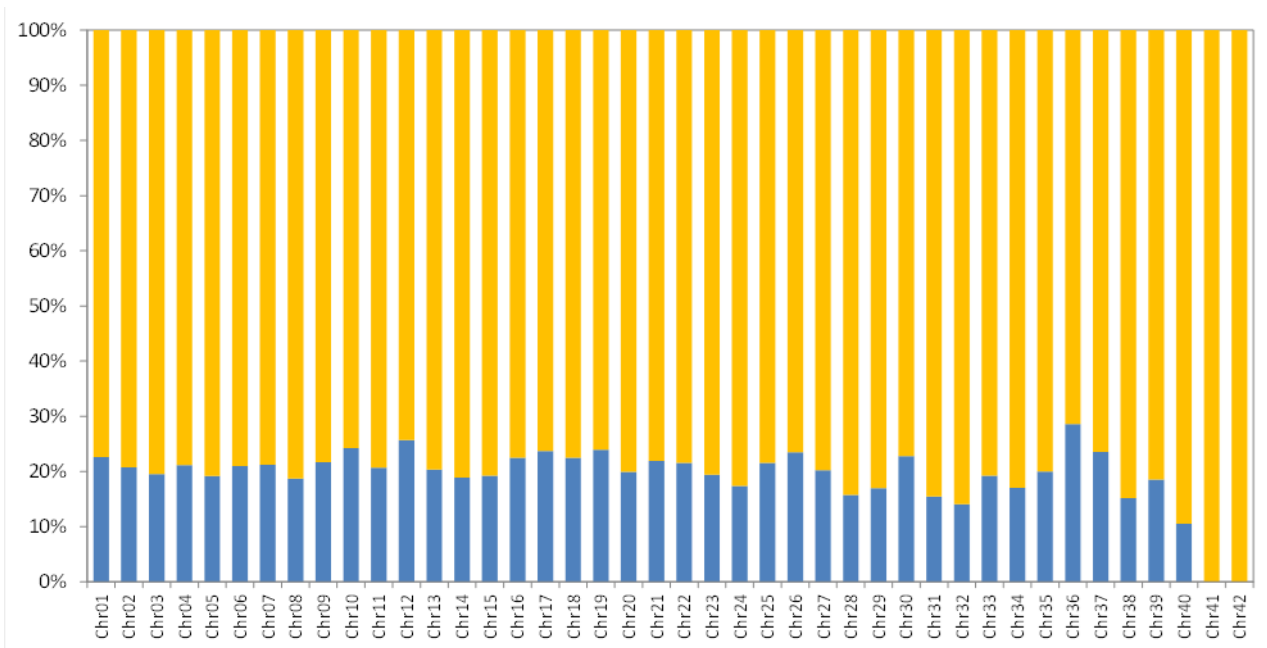

Supplemental Figure 5. Expression patterns of homeologous gene pairs throughout the 42 chromosome pairs. Abundance ratio of gene pairs showing synchronised (blue bars) and differential (orange bars) expression in each chromosome pair.

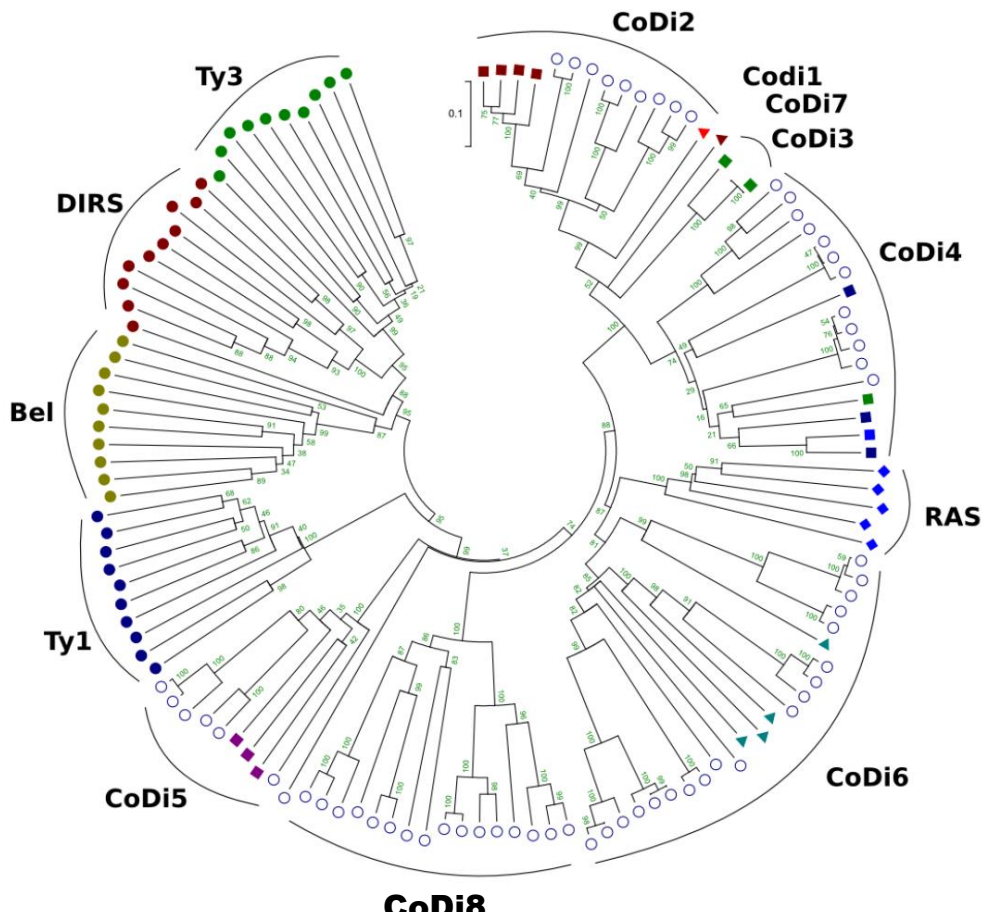

Supplemental Figure 6. CoDi classification in *F. solaris* JPCC DA0580 based on the RT domains. RAS refers to Red and Aquatic species. Unfilled circles are sequences from *F. solaris* JPCC DA0580.

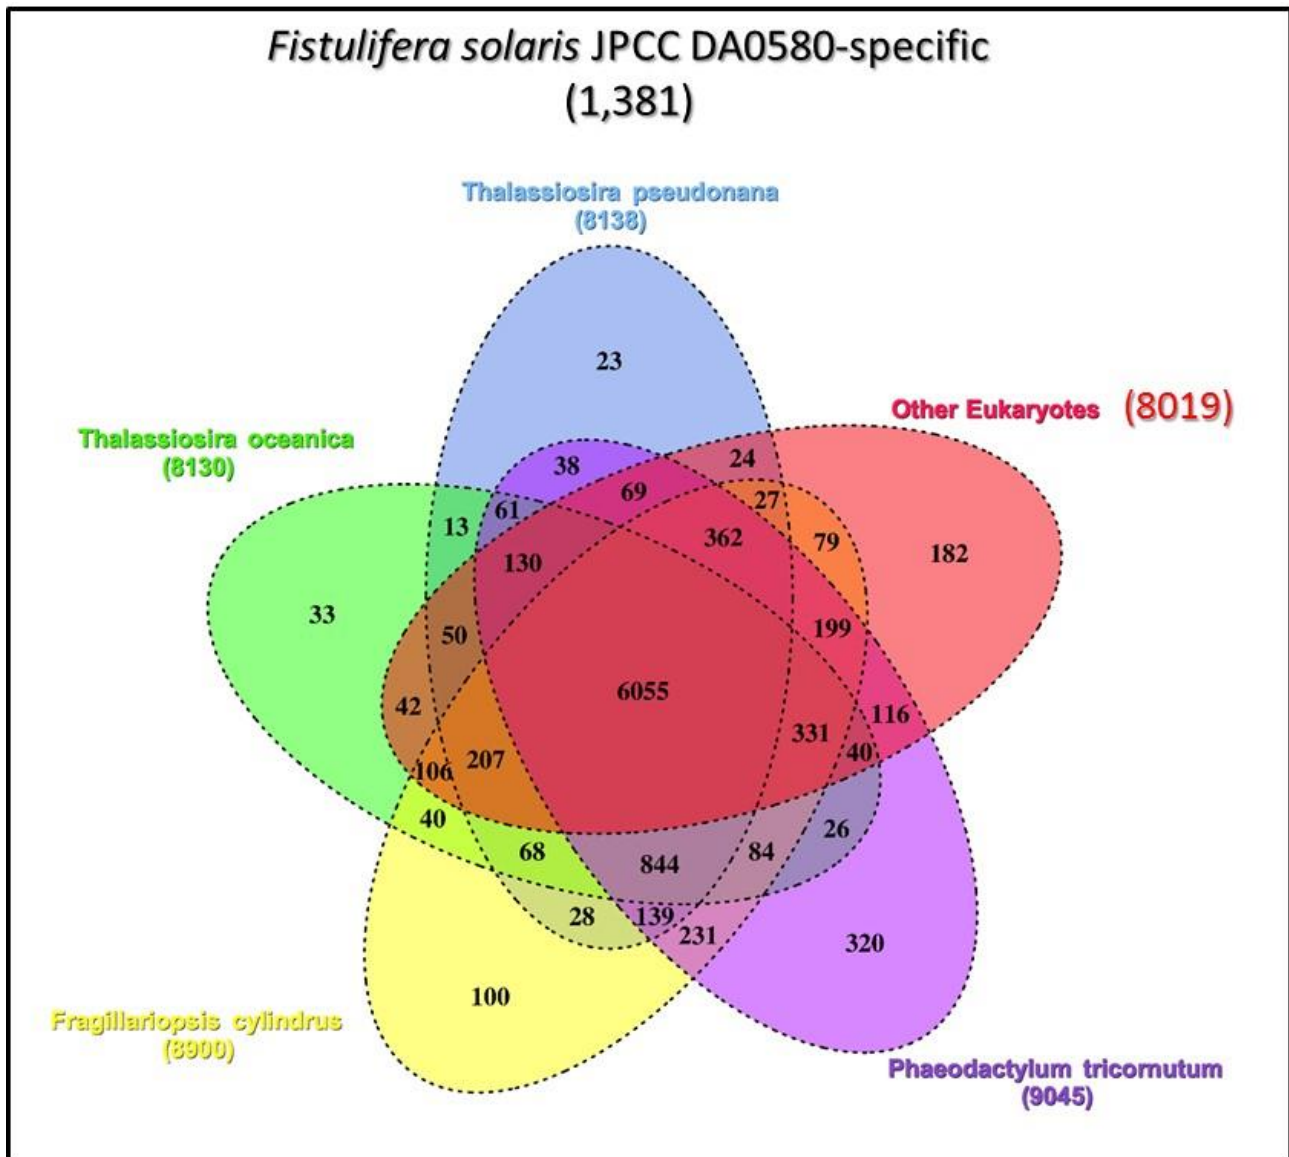

Supplemental Figure 7. Venn diagram of shared/unique genes of *F. solaris* JPCc DA0580. The outer square represents the whole set of *F. solaris* JPCc DA0580 (pennate) genes. Ellipses represent genes shared with *P. tricornutum* (pennate), *T. pseudonana* (centric), *T. oceanica* (centric), *F. cylindrus* (pennate), and other eukaryotes. The numbers of *F. solaris* JPCc DA0580 genes shared with other organisms are specified in brackets. The numbers of diatom-, pennate-, and *F. solaris*-specific genes are 844, 231, and 1,381, respectively.



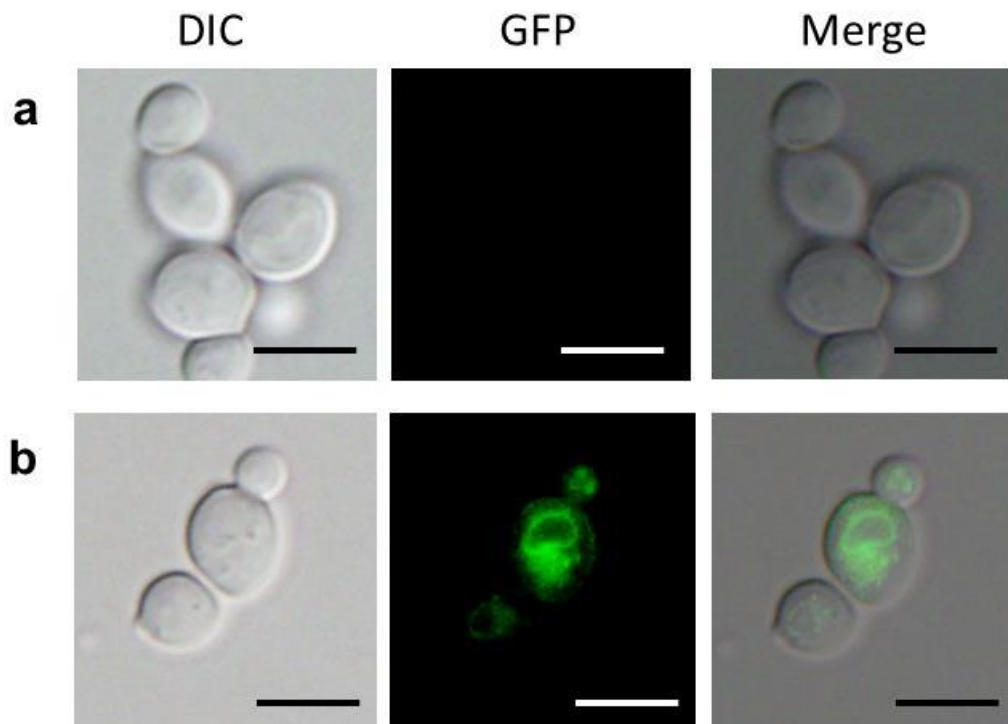

Supplemental Figure 8. Fluorescence microscopy of *Saccharomyces cerevisiae* cells expressing FIT-like protein. (a) The cells harboring an empty vector pYES2.1/V5-His/*lacZ*, and (b) the cells harboring FIT-like protein-GFP expression vector pYES2.1/V5-g11329-gfp. (scale bar = 5  $\mu$ m)

a

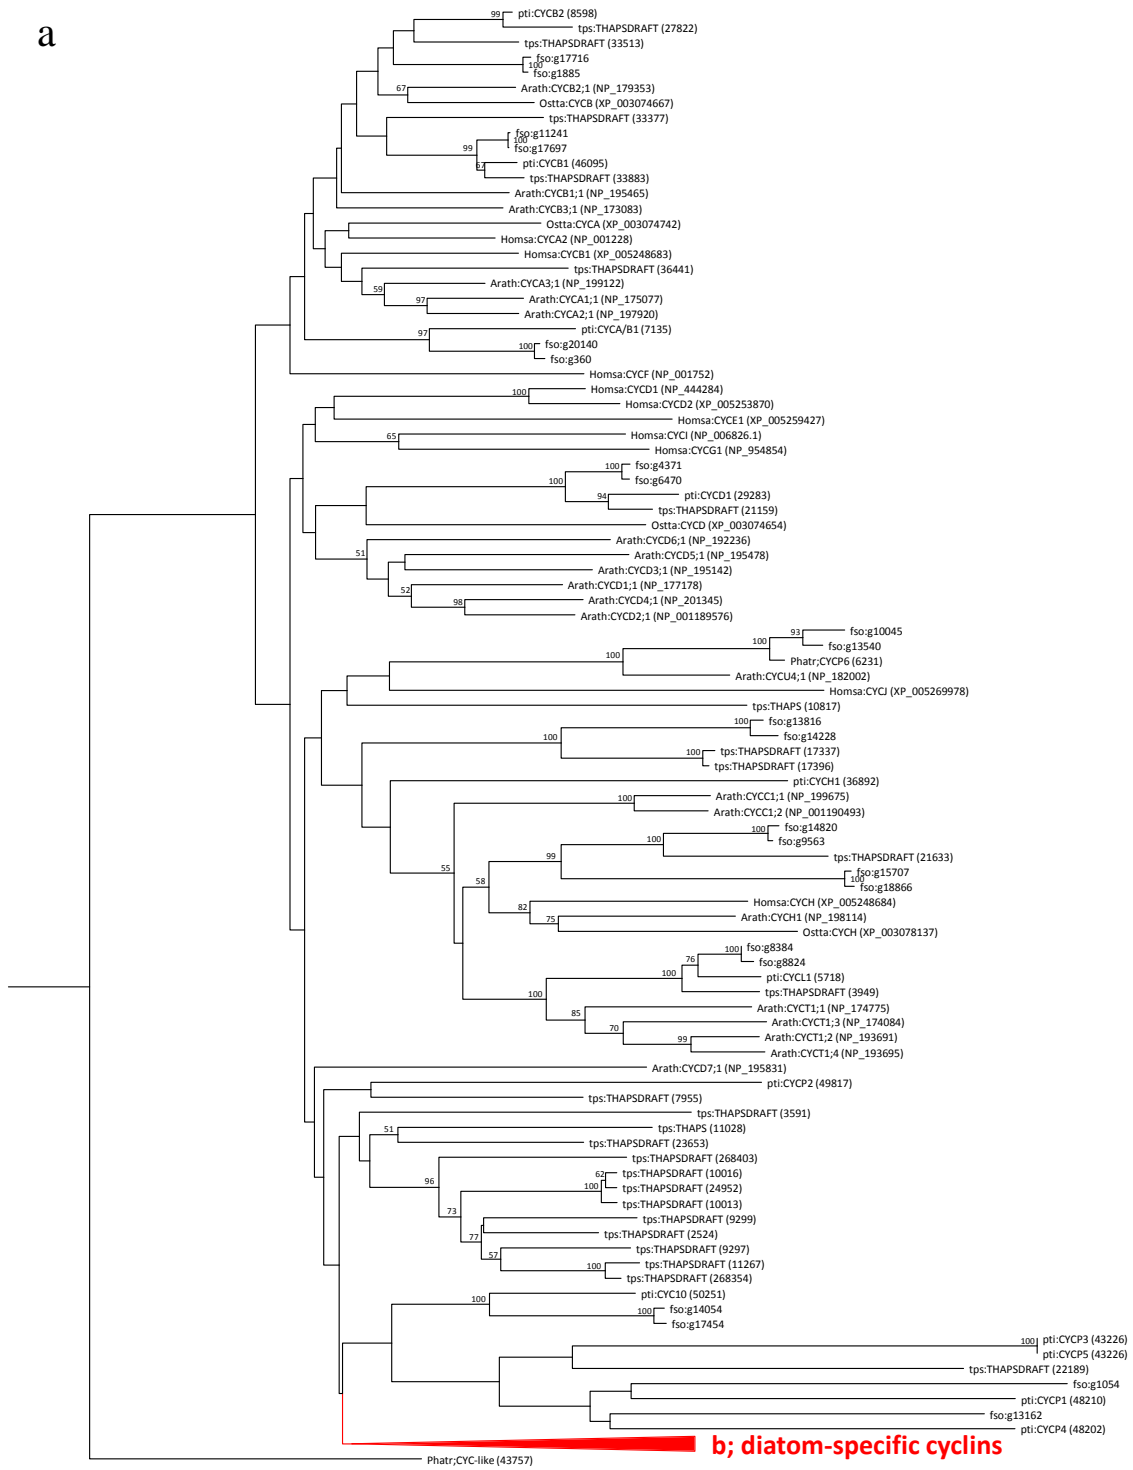

0.2

(continued)

**b**

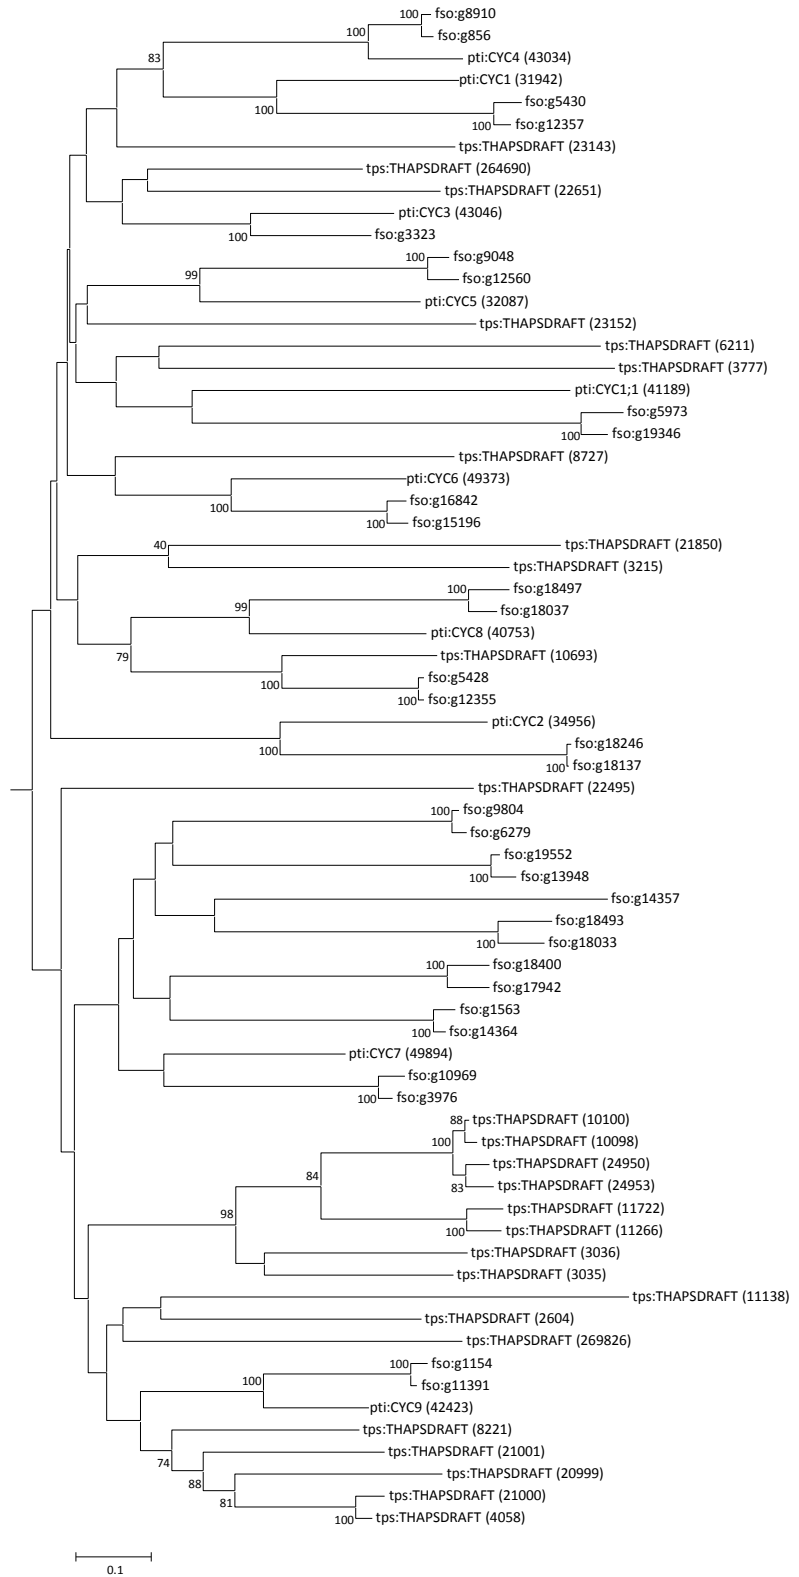

(continued)

Supplemental Figure 9. Phylogenetic analysis of the cyclins of *F. solaris* JPCC DA0580. The clade including diatom-specific cyclins is depicted as a red triangle in (a), and its detail is shown in (b). Abbreviations: fso, *F. solaris* JPCC DA0580; pti, *P. tricornutum*; tps, *T. pseudonana*; Arath, *Arabidopsis thaliana*; Homsa, *Homo sapience*; Ostta, *Ostreococcus tauri*



Supplemental Table 1. Sequencing analysis of *F. solaris* JPCC DA0580 by GS FLX Titanium DNA pyrosequencing

| <b>Parameters</b>                       | <b>Results</b> |
|-----------------------------------------|----------------|
| Total # of reads                        | 2,966,486      |
| Total length of reads (b)               | 1,239,444,594  |
| Redundant sequence coverage             | 24.8           |
| Total scaffold #                        | 297            |
| Total scaffold length (b)               | 49,899,580     |
| Avg. scaffold length (b)                | 168,012        |
| Maximum scaffold length (b)             | 904,706        |
| Contig #                                | 3,913          |
| Total contig length (b)                 | 49,713,831     |
| GC content (%)                          | 46.13          |
| Contig peak depth                       | 20             |
| Contig ( $\geq 500$ b) #                | 1,592          |
| Total contig ( $\geq 500$ b) length (b) | 49,433,762     |
| Contig ( $\geq 4$ kb) #                 | 1,083          |
| Total contig ( $\geq 4$ kb) length(b)   | 48,728,239     |

Supplemental Table 2. The list of genes shared between *F. solaris* JPCC DA0580-specific gene families and the entire *N. gaditana* gene family

| PFAM domain ID | PFAM domain    | Annotation                                             | Genes in <i>F. solaris</i>                   | Genes in <i>N. gaditana</i> |
|----------------|----------------|--------------------------------------------------------|----------------------------------------------|-----------------------------|
| PF00221        | PAL            | Phenylalanine and histidine ammonia-lyase              | g981                                         | Nga30438                    |
| PF00346        | Complex1_49kDa | Respiratory-chain NADH dehydrogenase, 49 Kd subunit    | g16662                                       | Nga50031                    |
| PF00932        | IF_tail        | Intermediate filament tail domain                      | g15656, g16968, g17044, g5419                | Nga05631                    |
| PF01056        | Myc_N          | Myc amino-terminal region                              | g7178, g8843                                 | Nga05585                    |
| PF01094        | ANF_receptor   | Receptor family ligand binding region                  | g4832, g4833, g8203, g8204, g8205            | Nga04451.1                  |
| PF01136        | Peptidase_U32  | Peptidase family U32                                   | g13254, g16553                               | Nga06945                    |
| PF01632        | Ribosomal_L35p | Ribosomal protein L35                                  | g17004                                       | Nga40026                    |
| PF02597        | ThiS           | ThiS family                                            | g12484, g5676                                | Nga40049                    |
| PF03024        | Folate_rec     | Folate receptor family                                 | g11127, g11130, g11151, g17613, g4184, g4187 | Nga30480                    |
| PF03066        | Nucleoplasmin  | Nucleoplasmin                                          | g13670, g13698, g6232, g7851, g8636, g8843   | Nga01971.01                 |
| PF03552        | Cellulose_synt | Cellulose synthase                                     | g16990, g8426                                | Nga05300                    |
| PF03845        | Spore_permease | Spore germination protein                              | g17080, g20313                               | Nga02631                    |
| PF04065        | Not3           | Not1 N-terminal domain, CCR4-Not complex component     | g5473, g605                                  | Nga02973                    |
| PF04086        | SRP-alpha_N    | Signal recognition particle, alpha subunit, N-terminal | g9011                                        | Nga05826.1                  |
| PF04148        | Erv26          | Transmembrane adaptor Erv26                            | g10909                                       | Nga05247                    |
| PF04494        | TFIID_90kDa    | WD40 associated region in TFIID subunit                | g17360, g18307                               | Nga20113.1                  |
| PF04934        | Med6           | MED6 mediator sub complex component                    | g11073, g207                                 | Nga01085                    |
| PF05432        | BSP_II         | Bone sialoprotein II (BSP-II)                          | g10281, g10904, g13743, g5559, g616          | Nga00963                    |
| PF05915        | DUF872         | Eukaryotic protein of unknown function (DUF872)        | g13246                                       | Nga02193.01                 |
| PF05964        | FYRN           | F/Y-rich N-terminus                                    | g15003, g15532                               | Nga03750.1                  |
| PF05995        | CDO_I          | Cysteine dioxygenase type I                            | g4423                                        | Nga06469                    |
| PF06101        | DUF946         | Plant protein of unknown function (DUF946)             | g11099, g182                                 | Nga00395                    |
| PF06108        | DUF952         | Protein of unknown function (DUF952)                   | g14145                                       | Nga07074                    |
| PF06179        | Med22          | Surfeit locus protein 5 subunit 22 of Mediator complex | g15954                                       | Nga00195.01                 |
| PF06624        | RAMP4          | Ribosome associated membrane protein RAMP4             | g11153, g17615, g8909                        | Nga00191                    |
| PF06810        | Phage_GP20     | Phage minor structural protein GP20                    | g11659, g14906, g2576, g5471                 | Nga02702                    |
| PF07574        | SMC_Nse1       | Nse1 non-SMC component of SMC5-6 complex               | g14836, g9579                                | Nga06324.01                 |
| PF07958        | DUF1688        | Protein of unknown function (DUF1688)                  | g10619, g13607                               | Nga02320.01                 |
| PF08432        | DUF1742        | Fungal protein of unknown function (DUF1742)           | g11462                                       | Nga04186                    |
| PF08636        | Pkr1           | ER protein Pkr1                                        | g18804                                       | Nga02572                    |
| PF08654        | DASH_Dad2      | DASH complex subunit Dad2                              | g19400                                       | Nga07178                    |
| PF08696        | Dna2           | DNA replication factor Dna2                            | g12853, g153                                 | Nga00884.1                  |
| PF09320        | DUF1977        | Domain of unknown function (DUF1977)                   | g16580, g6160                                | Nga02596                    |
| PF10153        | DUF2361        | Uncharacterised conserved protein (DUF2361)            | g10048, g13543                               | Nga04245                    |
| PF10174        | Cast           | RIM-binding protein of the cytomatrix active zone      | g15069, g19232, g2858, g9751                 | Nga07217                    |
| PF10229        | DUF2246        | Uncharacterized conserved protein (DUF2246)            | g15366, g8690                                | Nga04304.01                 |
| PF10261        | Scs3p          | Inositol phospholipid synthesis protein Scs3p          | g11329, g13770                               | Nga07301                    |
| PF10303        | DUF2408        | Protein of unknown function (DUF2408)                  | g6333                                        | Nga03427                    |
| PF10961        | DUF2763        | Protein of unknown function (DUF2763)                  | g17706                                       | Nga03702                    |
| PF11543        | UN_NPL4        | Nuclear pore localisation protein NPL4                 | g16948                                       | Nga01268.01                 |
| PF11831        | DUF3351        | Domain of unknown function (DUF3351)                   | g2360, g3726                                 | Nga05876, Nga05879          |
| PF11861        | DUF3381        | Domain of unknown function (DUF3381)                   | g16169, g7852                                | Nga04812                    |
| PF11891        | DUF3411        | Domain of unknown function (DUF3411)                   | g7007, g916                                  | Nga02558                    |
| PF12063        | DUF3543        | Domain of unknown function (DUF3543)                   | g13365, g1444                                | Nga00270                    |
| PF12118        | SprA-related   | SprA-related family                                    | g18702                                       | Nga03714                    |
| PF12353        | eIF3g          | Eukaryotic translation initiation factor 3 subunit G   | g16545, g19014, g7134                        | Nga01351.01                 |
| PF12463        | DUF3689        | Protein of unknown function (DUF3689)                  | g12172, g16697                               | Nga06368                    |
| PF12619        | MCM2_N         | Mini-chromosome maintenance protein 2                  | g15355, g8680                                | Nga04400.1                  |

Supplemental Table 3. The number of diatom genes in the major metabolism pathways

|                        | <i>Fistulifera solaris</i> JPC<br>DA0580 | <i>P. tricorutum</i> | <i>T. pseudonana</i> |
|------------------------|------------------------------------------|----------------------|----------------------|
| Glycolysis             | 40                                       | 42                   | 38                   |
| Glyconeogenesis        | 6                                        | 6                    | 4                    |
| TCA cycle              | 20                                       | 20                   | 20                   |
| Nitrogen metabolism    | 17                                       | 17                   | 17                   |
| Carbohydrate synthesis | 12                                       | 13                   | 7                    |
| Fatty acid synthesis   | 11                                       | 10                   | 9                    |
| Fatty acid degradation | 17                                       | 20                   | 19                   |
| Glucolipid synthesis   | 10                                       | 10                   | 10                   |
| PUFA synthesis         | 10                                       | 10                   | 10                   |
| Calvin-Benson Cycle    | 7                                        | 9                    | 8                    |

## Supplemental Methods

### Repeat identification and annotation

Repeat identification and annotation is an important part of any genome sequencing project. Here, we used three approaches to annotate repeats: (1) structure-based detection of long-terminal repeats (LTRs); (2) sequence-based transposable element (TEs) identification; and (3) a combination of these methods for classification and annotation.

(i) *Structure-based LTR detection*: LTR pairs in the 297 scaffolds of *F. solaris* were detected with LTR\_finder (Xu and Wang, 2007). The presence of a primer binding site, integrase, reverse transcriptase domain, or RnaseH was used to facilitate LTR identification. LTR\_finder precisely predicts the reverse transcriptase domain which is later used for classification.

(ii) *Repeat identification by similarity search and annotation*: Repeat annotation was carried out using the two-step REPET pipeline (Flutre et al., 2011): (a) *de novo* repeat identification in the 297 scaffolds and (b) homology search against known repeats from RepBase-Dec2012 (Jurka et al., 2005). In the *de novo* TE identification, the *F. solaris* genome was split into small units, followed by high scoring pair (HSP) detection within the genome using BLASTER and WU-BLAST with e-value e-300. The second step was based on structural detection of LTRs using LTRharvest (Ellinghaus et al., 2008). Structural parameters included 100–1000 bp LTR, 87% similarity between the two LTRs, and 20-bp target site duplication (TSD) at the two ends. Clustering was performed using Grouper, Recon, and Piler. Multiple sequence alignments were built with MULTALIGN. Classification of the *de novo* library into LTRs, terminal inverted repeats, simple sequence repeat-like, PolyA, etc. was performed with the PASTEC tool according to the Wicker's classification model. The *de novo* and TE libraries from *P. tricornutum* and *T. pseudonana* were combined and clustered to create a consensus full-length diatom TE library. This library was used in the second step of genome annotation, for which BLASTER, RepeatMasker, and CENSOR were used. MATCHER removed overlapping HSPs and made connections with the 'long joint' procedure. LTR\_finder results and REPET-derived repeats were combined, curated, and exported to GFF3 format for loading into any genome visualisation tool.

Classification of the CoDi group was based on reverse transcriptase domains, shown in a phylogenetic tree with *Dictyostelium* intermediate repeat sequence (DIRS), Bel (Lineage of insect LTR), Ty1(Copia-type), and red/aquatic species (RAS) as outgroups. Diatom reverse transcriptase sequences were classified into 26 families (Seven CoDi groups) including the DIRS sequences from *Dictyostelium discoideum* and *Xenopus (Silurana) tropicalis*, Bel sequences from *Trichosurus vulpecula* and *Ovis aries*, Ty1 sequences from *Solanum demissum* and *Oryza sativa*, Ty3 from *Oryza sativa*, and RAS from *Eumunida annulosa* and *Porphyra yezoensis*, as well as the *F. solaris* reverse transcriptase domain sequences. A multiple sequence alignment of the reverse transcriptase domain clusters was generated with MULTALIGN and the phylogenetic tree was created using MEGA5 software. Compared to *T. pseudonana* and *P. tricornutum*, we found an expansion of CoDi elements in *F. solaris* (both in copy number and new class). *F. solaris*-specific CoDi is marked as 'CoDi8'.



### Transcription factor detection

HMMER3.0 was used to search for transcription factors with e-value <0.00001. Transcription factor family sequences were obtained from domain database Pfam-A. We performed a comparative analysis of transcription factors for other diatom proteomes with RNAseq support.

### Comparative studies of genes

Comparative gene-set analysis in *F. solaris*, four other sequenced diatoms (*P. tricornutum*, *T. pseudonana*, *T. oceanica*, and *Fragillariopsis cylindrus*), and other eukaryotic organisms recorded in the National Center for Biotechnology Information (NCBI) database was performed using BLASTP with e-value of  $10^{-5}$  and a 50-amino acid overlap. Sequence searches against publicly available databases and comparative analysis showed that diatom genes originated from at least four phylogenetic groups (Eukaryotic core, Diatom core, Species-specific gene set, and Bacterial origin group). *F. solaris*-specific genes were derived by pairwise comparison against these data sets. Genes (Filtered set) from the four diatoms were obtained from JGI and GEOMAR. The overlap was plotted using VennDiagram library in R. Diatom-specific genes were present in all analysed diatoms but not elsewhere. Pennate-specific genes were present in *P. tricornutum*, *Fragillariopsis cylindrus*, and *F. solaris* but not elsewhere. *F. solaris*-specific genes were found only in the genome of *F. solaris* JPC0580.

### Prediction of pathway localisation

Candidate genes in pathways such as carbon and lipid metabolism were screened by BLASTP. Protein sequences with KO numbers in the KEGG database or protein sequences described in published papers were used as query sequences. Candidate genes were submitted to InterProScan to identify protein signatures and provide annotation. In cases where gene annotations based on protein signatures were ambiguous, phylogenetic tree analysis was also used to assess phylogenetic relationships with diatom genes of known function. Finally, the localisation of proteins encoded by these annotated genes was predicted using several bioinformatics programs. TargetP (Emanuelsson et al., 2000) and HECTAR (Gschloessl et al., 2008) were used to predict general protein localisation. Signal peptides for the ER or chloroplast-targeting peptides were screened using SignalP (Bendtsen et al., 2004). When a cleavage site was predicted by SignalP, the presence of an ER retention signal (K(/D)-D(/E)-E-L) in the C-terminus was checked manually (Kroth et al., 2008). If proteins possessed no ER retention signals and contained F, W, Y, or L at the +1 position of cleavage sites, they were considered to be chloroplast-targeted proteins (Gruber et al., 2007). When proteins were predicted by both TargetP and HECTAR to be localised in the mitochondria, the proteins were considered to be transported into mitochondria. In addition, Mitoprot (Claros and Vincens, 1996) was used to detect mitochondrial targeting peptides. If (1) the Mitoprot score was >0.9 or (2) >0.8 and mitochondrial localisation was predicted by either TargetP or HECTAR, the proteins were also considered to be transported into mitochondria. For proteins without chloroplast or mitochondrial targeting peptides, peroxisome-targeting signals at the C-terminus (S(/A/C)-K(/R/H)-L(/M) or S-S-L) were checked manually (Gonzalez et al., 2011). TMHMM (Krogh et al., 2001) was used to

detect transmembrane regions. If transmembrane regions were predicted in proteins without targeting peptides, the possibility of ER localisation could not be excluded. Proteins that conform to none of the above criteria were predicted to be localised in the cytoplasm. This pipeline was also described in previous report (Sunaga et al., 2014).

### Single-cell analysis

Single-cell entrapment of *F. solaris* and manipulation were conducted on a microcavity array. The device was microfabricated as described (Hosokawa et al., 2009; Hosokawa et al., 2012). In brief, a poly(ethylene terephthalate) (PET) plate (20 × 20 mm, thickness = 38 μm) was used as the substrate to fabricate the microcavity array. The distance between each cavity was 30 μm, with 44,100 cavities arranged in a 210 × 210 array on a typical microscope glass slide. A poly(dimethylsiloxane) (PDMS) structure equipped with a vacuum microchannel (i.d. = 500 μm) was fitted directly beneath the microcavity array to apply negative pressure for cell entrapment. The vacuum microchannel was connected to a peristaltic pump, and the cell entrapment setup was placed on the computer-operated motorised stage of an upright microscope.

*Single F. solaris cell entrapment.* *F. solaris*: cells at logarithmic growth phase ( $10^6$  cells) were loaded onto the microcavity array. Negative pressure was applied to the cell suspension in phosphate-buffered saline using a peristaltic pump connected to the vacuum microchannel at a flow rate of 200 μL/min, allowing the cells to be driven towards and entrapped on the array (Supplemental Figure 8-a). Images of the entrapped cells were captured using a fluorescence microscope (BX61; Olympus Corporation, Japan) equipped with a computer-operated motorised stage, FGW filter sets (Olympus Corporation, Japan), and a cooled digital camera (DP70; Olympus Corporation, Japan). Lumina Vision acquisition software (Mitani Corporation, Japan) was used for image acquisition.

*Single-cell RT-PCR analysis for the detection of mRNAs from each glyceraldehyde-3-phosphate dehydrogenase (GAPDH) homeologous genes:* Single cells were collected from the cavities by using micropipettes (20 μm diameter) made from glass capillaries using a micromanipulator system (Eppendorf Co., Ltd., Tokyo, Japan). The recovered cells were transferred to a 10-μL microtube. The recovered single cells were used directly for reverse transcription and PCR amplification with the Primescript RT-PCR Kit (Takara Bio Inc., Japan). mRNA extraction (65°C for 5 min) and annealing with an Oligo-dT primer (4°C for 10 min) were followed by reverse transcription at 42°C for 60 min and 95°C for 5 min, and by PCR amplification for 50 cycles at 94°C for 30 s and 60°C for 30 s. PCR products were confirmed by 1% agarose gel electrophoresis with ethidium bromide staining and by sequencing. Amplification primers for GAPDH (g12876 and g19411) were as follows: 5'-ACGGAAAAGGCTCAGGCC-3' (forward primer for g12876), 5'-TCGACGATACTGGAGCGC-3' (reverse primer for g12876), 5'-CACGGAAAAGGCTCAGGCA-3' (forward primer for g19411), and 5'-GGACGAAATCTTGCGACACA-3' (reverse primer for g12876).

### Expression of gene encoding FIT-like protein in yeast cells

Comparative gene family analysis revealed a unique family of *FIT* genes (also known as *Scs3p*) shared with *F. solaris* and *N. gaditana* (Figure 2 in the main text). Two genes encoding homeologous FIT-like protein (g11329, g13770) were assigned to this family from the genome (Supplemental Table 2). For heterologous expression of g11329 in yeast cells, an expression vector including a g11329-*gfp* fusion gene was constructed. A g11329 gene fragment without stop codon was amplified from *F. solaris* genomic DNA, then inserted into the *EcoRI* site within the vector, pSP-GFP/GAPDH (Nojima et al., 2013) to fuse the g11329 and *gfp* genes (performed by Takara Bio Inc., Japan). The constructed g11329-*gfp* fusion gene was amplified using a specific primer set (Forward primer; 5' – ATG CCT CCC CGG GAA GCC – 3', Reverse primer; 5' – CTT GTA CAG CTC GTC CAT GC – 3'), and cloned into the yeast expression vector pYES2.1/V5-His-TOPO (Invitrogen). The constructed plasmid is denoted pYES2.1/V5-g11329-GFP. *Saccharomyces cerevisiae* INVSc-1 (*MATa/MAT $\alpha$* , *his3 $\Delta$ 1/his3 $\Delta$ 1*, *leu2/leu2*, *trip1-289/trip1-289*, and *ura3-52/ura3-52*) (Invitrogen) was transformed with the plasmid DNA using *S. c.* EasyComp™ Transformation Kit (Invitrogen) according to the manufacturer's instructions. Yeast cells harboring the pYES2.1/V5-His/*lacZ*, which does not include g11329 gene, were used as a negative control. The transformants were selected by uracil prototrophy on a selective dropout media (SD) plate lacking uracil. For protein expression, SD medium containing 2% (w/v) galactose was used, and the transformants grown at 30°C. The resulting cells were observed using a fluorescence microscope (BX51; Olympus Corporation, Tokyo, Japan) equipped with a cooled digital camera (DP-70; Olympus) with a NIBA filter set for GFP.

### Phylogenetic genetic analysis of cyclins

The cyclin amino acid sequences were retrieved from the genome sequence data of *P. tricornutum*, *T. pseudonana*, *Arabidopsis thaliana*, *Homo sapience* and *Ostreococcus tauri* in the NCBI database, where cyclins were searched with the following KEGG orthology (KO) number (ko:K15161, ko:K15188, ko:K14505, ko:K12760, ko:K10289, ko:K10145, ko:K10146, ko:K10151, ko:K10152, ko:K06659, ko:K06656, ko:K06657, ko:K06654, ko:K06626, ko:K06627, ko:K06634, ko:K06646, ko:K06650, ko:K06651, ko:K05868, ko:K04503). The amino acid sequences were aligned with that of *F. solaris* using the ClustalW (Larkin et al., 2007). The phylogenetic tree was constructed via the neighbor-joining method and evaluated with 1,000 rounds of bootstrapping using MEGA5.0 (Tamura et al., 2011). The bootstrap values for neighbor-joining analysis was calculated to measure the tree strength.

**Abbreviations**

|          |                                                                              |
|----------|------------------------------------------------------------------------------|
| ACAT     | acetyl-CoA acyltransferase                                                   |
| ACC      | acetyl-CoA carboxylase                                                       |
| ACP      | acyl carrier protein                                                         |
| ADE      | acyl-CoA dehydrogenase                                                       |
| AHY      | aconitate hydratase                                                          |
| AMPK     | AMP-activated kinase                                                         |
| AOX      | acyl-CoA oxidase                                                             |
| Arg      | arginase                                                                     |
| AsL      | argininosuccinate lyase                                                      |
| AsuS     | argininosuccinate synthase                                                   |
| BDE      | butyryl-CoA dehydrogenase                                                    |
| BGL      | beta-glucosidase                                                             |
| BGS      | 1,3- $\beta$ -glucan synthase                                                |
| BLAST    | basic local alignment search tool                                            |
| Chr      | chromosome                                                                   |
| CAT1     | carnitine acyltransferase I (also known as carnitine palmitoyltransferase I) |
| CPS      | carbamoyl phosphate synthase (ammonia-dependent)                             |
| CPT      | cholinephosphotransferase                                                    |
| CSY      | citrate synthase                                                             |
| DAG      | diacylglycerol                                                               |
| DGAT     | diacylglycerol acyltransferase                                               |
| DGD      | digalactosyldiacylglycerol synthase                                          |
| DGDG     | digalactosyldiacylglycerol                                                   |
| DGK      | diacylglycerol kinase                                                        |
| DIRS     | <i>Dictyostelium</i> intermediate repeat sequence                            |
| EAR      | enoyl-ACP reductase                                                          |
| EHY      | enoyl-CoA hydratase                                                          |
| EHY/HADE | enoyl-CoA hydratase/beta-hydroxyacyl-CoA dehydrogenase                       |
| endo-Glu | endo-1,3- $\beta$ -glucanase                                                 |
| ENO      | enolase                                                                      |
| ER       | endoplasmic reticulum                                                        |
| exo-Glu  | exo-1,3- $\beta$ -glucanase                                                  |
| FAS      | fatty acid synthesis                                                         |
| FBA      | fructose-bisphosphate aldolase                                               |
| FBP      | fructose-1,6-bisphosphatase                                                  |
| FFA      | free fatty acid                                                              |



|         |                                                   |
|---------|---------------------------------------------------|
| FHY     | fumarate hydratase, class I                       |
| GAPDH   | glyceraldehyde-3-phosphate dehydrogenase          |
| GLK     | glucokinase                                       |
| GOGAT   | glutamate synthase (ferredoxin-dependent)         |
| GPAT    | glycerol-3-phosphate acyltransferase              |
| GPI     | glucose-6-phosphate isomerase                     |
| GS      | glutamine synthetase                              |
| G3P     | glycerol 3-phosphate                              |
| HAD     | beta-hydroxyacyl-ACP dehydrase                    |
| HADE    | beta-hydroxyacyl-CoA dehydrogenase                |
| HMM     | Hidden Markov model                               |
| HSP     | high scoring pair                                 |
| ICDE    | isocitrate dehydrogenase                          |
| KAR     | beta-ketoacyl-ACP reductase                       |
| KAS     | beta-ketoacyl-ACP synthase                        |
| KEGG    | Kyoto encyclopedia of genes and genomes           |
| KO      | KEGG orthology                                    |
| LACS    | long-chain acyl-CoA synthetase                    |
| LPAAT   | lysophosphatidic acid acyltransferase             |
| LTR     | long-terminal repeat                              |
| Lyso-PA | lyso-phosphatidic acid                            |
| MAT     | malonyl-CoA ACP transacylase                      |
| MDE     | malate dehydrogenase                              |
| MGD     | monogalactosyldiacylglycerol synthase             |
| MGDG    | monogalactosyldiacylglycerol                      |
| NCBI    | National Center for Biotechnology Information     |
| NiR     | nitrite reductase (ferredoxin-dependent)          |
| NR      | nitrate reductase (NADH-dependent)                |
| OCD     | ornithine cyclodeaminase                          |
| OdC     | ornithine decarboxylase                           |
| ODE     | 2-oxoglutarate dehydrogenase E1 component         |
| OTC     | ornithine carbamoyltransferase                    |
| PBS     | phosphate-buffered saline                         |
| PA      | phosphatidic acid                                 |
| PC      | pyruvate carboxylase                              |
| PDAT    | phospholipid:diacylglycerol acyltransferase       |
| PDE     | pyruvate dehydrogenase E1 component subunit alpha |
| PDMS    | poly(dimethylsiloxane)                            |

|                 |                                                           |
|-----------------|-----------------------------------------------------------|
| PEPCK           | phosphoenolpyruvate carboxykinase                         |
| PET             | poly(ethylene terephthalate)                              |
| PFK             | phosphofructokinase                                       |
| PG              | phosphatidylglycerol                                      |
| PGAM            | phosphoglycerate mutase                                   |
| PGK             | phosphoglycerate kinase                                   |
| PGPS            | phosphatidylglycerol phosphate synthase                   |
| PIPLC           | phosphoinositide phospholipase C                          |
| PK              | pyruvate kinase                                           |
| PP              | phosphatidate phosphatase                                 |
| PUFA            | polyunsaturated fatty acid                                |
| RAS             | red/aquatic species                                       |
| rDNA            | ribosomal RNA gene                                        |
| RPKM            | reads per kilobase of exon model per million mapped reads |
| RT              | reverse transcription                                     |
| SCS             | succinyl-CoA synthetase alpha subunit                     |
| SDE             | succinate dehydrogenase (ubiquinone) flavoprotein subunit |
| shRNA           | small hairpin RNA                                         |
| SQD2            | sulfoquinovosyltransferase                                |
| SQDG            | sulfoquinovosyldiacylglycerol                             |
| TAG             | triacylglycerol                                           |
| TCA             | tricarboxylic acid                                        |
| TE              | transposable element                                      |
| TPI             | triosephosphate isomerase                                 |
| UGP             | UDP-glucose pyrophosphorylase                             |
| Ure             | urease                                                    |
| $\Delta 5$      | $\Delta 5$ desaturase                                     |
| $\Delta 6$      | $\Delta 6$ desaturase                                     |
| $\Delta 6$ -ELO | poly unsaturated elongase ( $\Delta 6$ )                  |
| $\Delta 9$      | $\Delta 9$ desaturase                                     |
| $\Delta 12$     | $\Delta 12$ desaturase                                    |
| $\Delta 15$     | $\Delta 15$ desaturase                                    |

## Supplemental References

- Bendtsen, J.D., Nielsen, H., von Heijne, G., and Brunak, S.** (2004). Improved prediction of signal peptides: SignalP 3.0. *J Mol Biol* **340**, 783-795.
- Claros, M.G., and Vincens, P.** (1996). Computational method to predict mitochondrially imported proteins and their targeting sequences. *Eur J Biochem* **241**, 779-786.
- Ellinghaus, D., Kurtz, S., and Willhoeft, U.** (2008). LTRharvest, an efficient and flexible software for de novo detection of LTR retrotransposons. *BMC Bioinformatics* **9**, 18.
- Emanuelsson, O., Nielsen, H., Brunak, S., and von Heijne, G.** (2000). Predicting subcellular localization of proteins based on their N-terminal amino acid sequence. *J Mol Biol* **300**, 1005-1016.
- Flutre, T., Duprat, E., Feuillet, C., and Quesneville, H.** (2011). Considering transposable element diversification in de novo annotation approaches. *PloS one* **6**, e16526.
- Gonzalez, N.H., Felsner, G., Schramm, F.D., Klingl, A., Maier, U.G., and Bolte, K.** (2011). A Single Peroxisomal Targeting Signal Mediates Matrix Protein Import in Diatoms. *PloS one* **6**.
- Gruber, A., Vugrinec, S., Hempel, F., Gould, S.B., Maier, U.-G., and Kroth, P.G.** (2007). Protein targeting into complex diatom plastids: functional characterisation of a specific targeting motif. *Plant Mol Biol* **64**, 519-530.
- Gschloessl, B., Guermeur, Y., and Cock, J.M.** (2008). HECTAR: a method to predict subcellular targeting in heterokonts. *BMC Bioinformatics* **9**, 393.
- Hosokawa, M., Arakaki, A., Takahashi, M., Mori, T., Takeyama, H., and Matsunaga, T.** (2009). High-density microcavity array for cell detection: single-cell analysis of hematopoietic stem cells in peripheral blood mononuclear cells. *Anal Chem* **81**, 5308-5313.
- Hosokawa, M., Asami, M., Nakamura, S., Yoshino, T., Tsujimura, N., Takahashi, M., Nakasono, S., Tanaka, T., and Matsunaga, T.** (2012). Leukocyte counting from a small amount of whole blood using a size-controlled microcavity array. *Biotechnol Bioeng* **109**, 2017-2024.
- Jurka, J., Kapitonov, V.V., Pavlicek, A., Klonowski, P., Kohany, O., and Walichiewicz, J.** (2005). Repbase Update, a database of eukaryotic repetitive elements. *Cytogenet Genome Res* **110**, 462-467.
- Krogh, A., Larsson, B., von Heijne, G., and Sonnhammer, E.L.** (2001). Predicting transmembrane protein topology with a hidden Markov model: application to complete genomes. *J Mol Biol* **305**, 567-580.
- Kroth, P.G., Chiovitti, A., Gruber, A., Martin-Jezequel, V., Mock, T., Parker, M.S., Stanley, M.S., Kaplan, A., Caron, L., Weber, T., Maheswari, U., Armbrust, E.V., and Bowler, C.** (2008). A model for carbohydrate metabolism in the diatom *Phaeodactylum tricornutum* deduced from comparative whole genome analysis. *PloS One* **3**, e1426.
- Larkin, M.A., Blackshields, G., Brown, N.P., Chenna, R., McGettigan, P.A., McWilliam, H., Valentin, F., Wallace, I.M., Wilm, A., Lopez, R., Thompson, J.D., Gibson, T.J., Higgins, D.G.** (2007). Clustal

W and clustal X version 2.0. Bioinformatics **23**, 2947-8.

**Nojima, D., Yoshino, T., Maeda, Y., Tanaka, M., Nemoto, M., and Tanaka, T.** (2013). Proteomics analysis of oil body-associated proteins in the oleaginous diatom. J Proteome Res **12**, 5293-5301.

**Sunaga, Y., Maeda, Y., Yabuuchi, T., Muto, M., Yoshino, T., and Tanaka, T.** (2014). Chloroplast-targeting protein expression in the oleaginous diatom *Fistulifera solaris* JPCC DA0580 toward metabolic engineering. J Biosci Bioeng. **119**, 28-34

**Tamura, K., Peterson, D., Peterson, N., Stecher, G., Nei, M., and Kumar, S.** (2011). MEGA5: Molecular evolutionary genetics analysis using maximum likelihood, evolutionary distance, and maximum parsimony methods. Mol Biol Evol **28**, 2731-2739.

**Xu, Z., and Wang, H.** (2007). LTR\_FINDER: an efficient tool for the prediction of full-length LTR retrotransposons. Nucleic Acids Res **35**, W265-268.
